# Supplementary material for: Decorative Multi-Walled Carbon Nanotubes by ZnO: Synthesis, Characterization, and Potent Anti-Toxoplasmosis Activity
Source: MDPI journal article supplement (doi:10.3390/met12081246), 2022-07-25
Supplement: s1 [file s1]

## Article

# Decorative Multi-Walled Carbon Nanotubes by ZnO: Synthesis, Characterization, and Potent Anti-Toxoplasmosis Activity

Jehan Y. Al-Humaidi <sup>1</sup>, Mohamed Hagar <sup>2</sup>, Basant A. Bakr <sup>3</sup>, Bassma H. Elwakil <sup>4,\*</sup>, Esraa Abdelhamid Moneer <sup>4</sup> and Mostafa El-Khatib <sup>5</sup>

<sup>1</sup> Department of Chemistry, College of Science, Princess Nourah Bint Abdulrahman University, P.O. Box 84428, Riyadh 11671, Saudi Arabia; Jyalhamidi@pnu.edu.sa

<sup>2</sup> Department of Chemistry, Faculty of Science, Alexandria University, Alexandria 21321, Egypt; mohamedhaggar@gmail.com

<sup>3</sup> Department of Zoology, Faculty of Science, Alexandria University, Alexandria 21321, Egypt; bassant.kamal@pua.edu.eg

<sup>4</sup> Department of Medical Laboratory Technology, Faculty of Applied Health Sciences Technology, Pharos University in Alexandria, Alexandria 21526, Egypt; E.A.M: [esraa.moneer@pua.edu.eg](mailto:esraa.moneer@pua.edu.eg)

<sup>5</sup> Basic Sciences Department, Faculty of Engineering, Pharos University in Alexandria, Alexandria 21526, Egypt; mostafa.elkhatib@pua.edu.eg

\* Correspondence: [bassma.hassan@pua.edu.eg](mailto:bassma.hassan@pua.edu.eg)

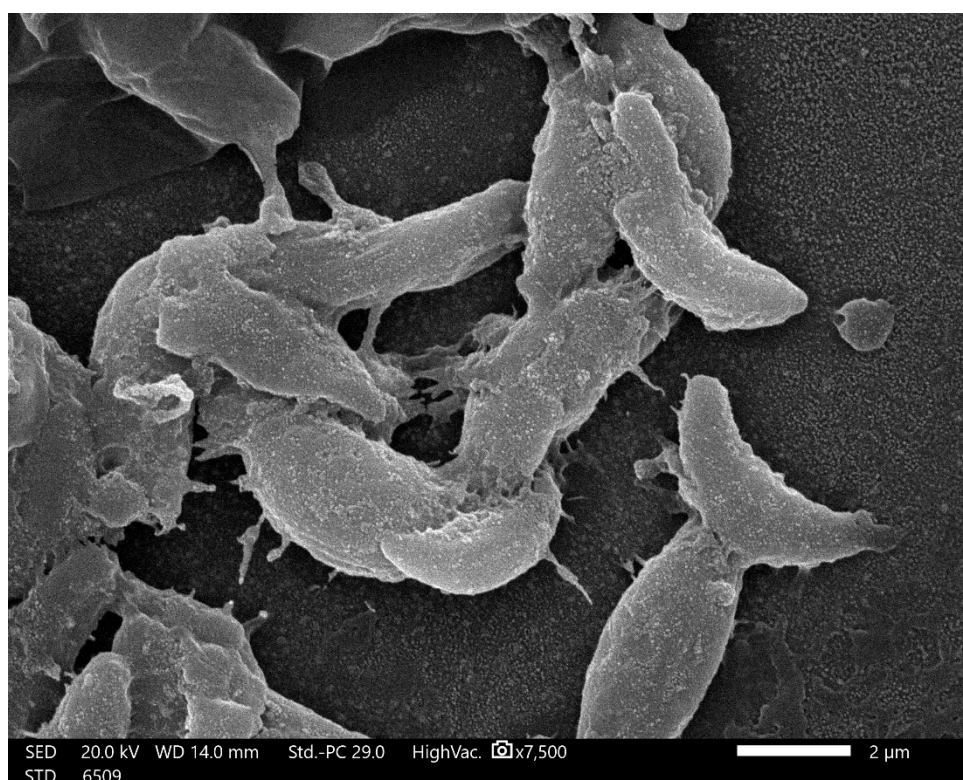

**Figure S1.** SEM of *Toxoplasma gondii* tachyzoite in infected group showing completely irregular surface, multiple ridges, irregular papules and dimples ( $\times 10,000$ ).

Cerebral cortex

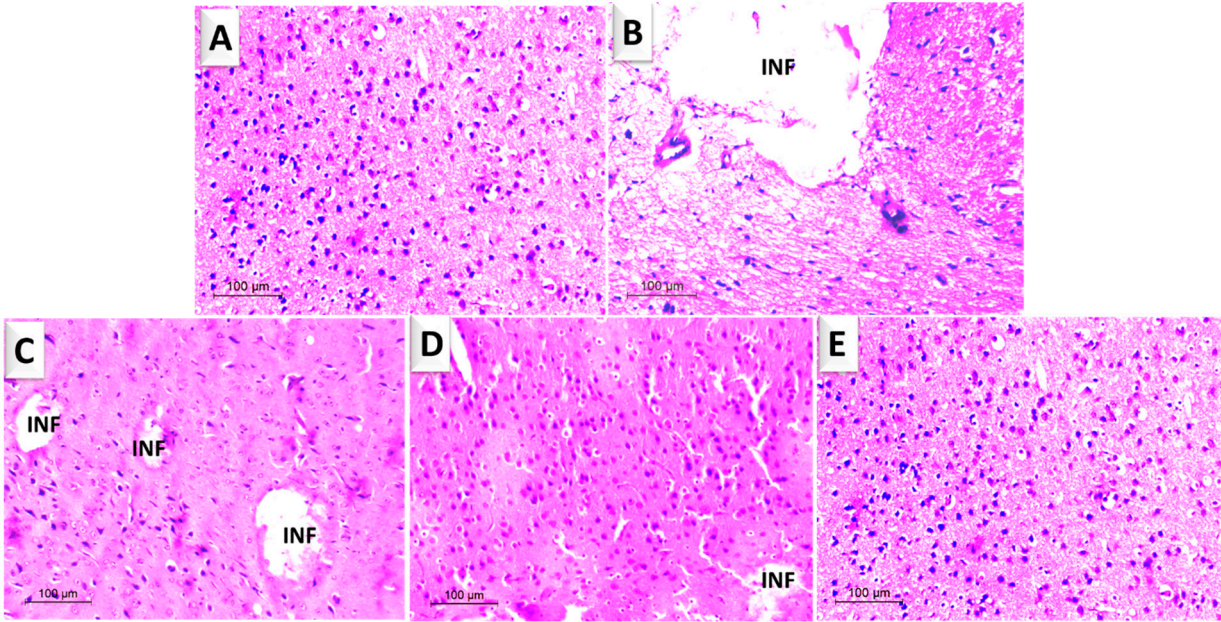

Liver

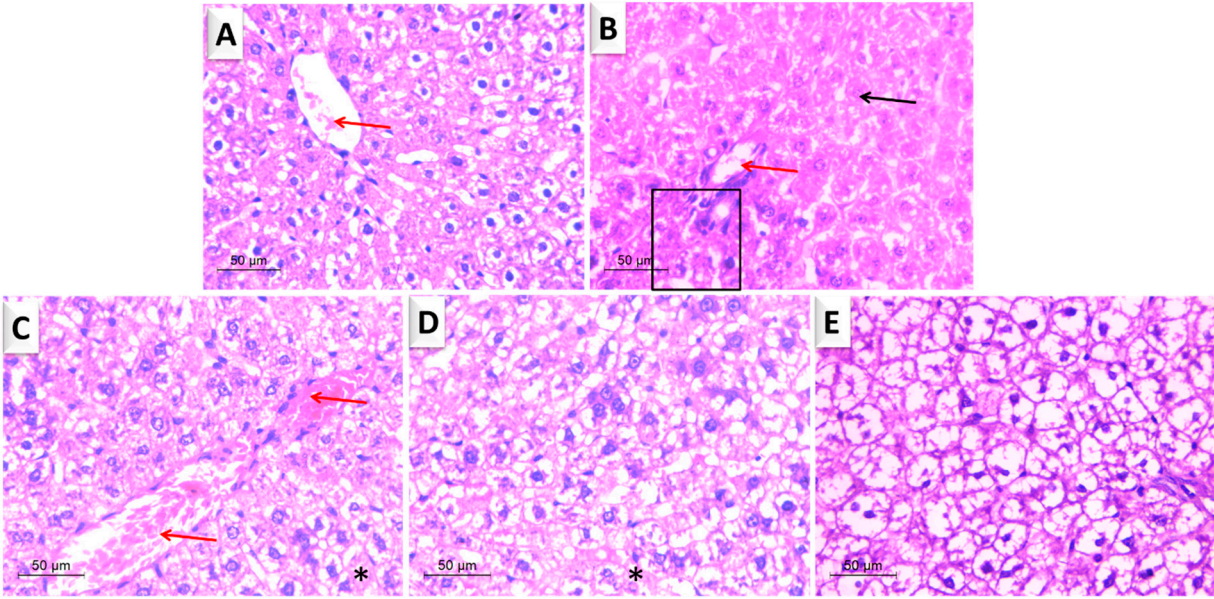



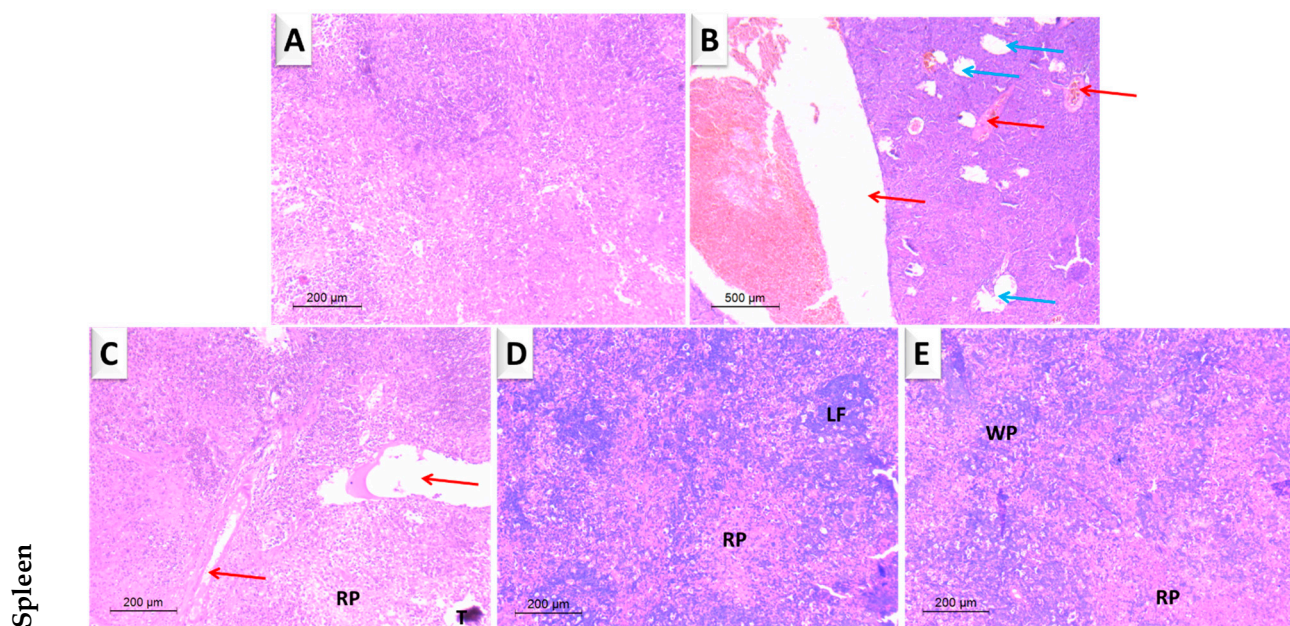

**Figure S2.** A photomicrograph illustrates several H&E-stained tissue specimens from the cerebral cortex, liver, and spleen. (A); Group I healthy control (B); Group II infected control (C); Group III received Zn-NPs (D); Group IV received GO-NPs (E); Group V received ZnO-MWCNT. Note: Grey arrow: nuclear degeneration, Black insert: necrosis, Red arrow refers to blood vessel, INF: cerebral infract, Blue arrow: cellular degeneration, Black stars refer to dilated blood sinusoids, RP: red Pulp, WP: white Pulp and LF: Lymphoid follicle.
